# Supplementary material
Source: ML conference proceedings conference paper supplement (https://proceedings.neurips.cc/paper_files/paper/2014/hash/fc528592c3858f90196fbfacc814f235-Abstract.html)
Supplement: Supplementary file [file fc528592c3858f90196fbfacc814f235-Supplemental.zip]

# Streaming, Memory Limited Algorithms for Community Detection: Supplementary Material

## A Algorithms

We present below three algorithms that constitute building blocks of the main algorithms presented in the paper.

---

**Algorithm 4** Approx ( $A, \hat{p}, V, K$ )

---

**Input:**  $A, \hat{p}, V, K$   
 $\ell^* \leftarrow \max\{1, \lfloor |V| \exp(-|V|\hat{p}) \rfloor\}$   
**for**  $v \in V$  **do**  
 $x_v \leftarrow \sum_{w \in V} A_{vw}$   
**end for**  
 $x^* \leftarrow \ell^*$ -th largest  $x_v$   
 $\Gamma \leftarrow \{v | x_v \leq x^*, v \in V\}$   
 $\bar{A} \leftarrow (A_{vw})_{v,w \in \Gamma}$   
 $(Q, \sigma_K) \leftarrow \text{Power Method}(\bar{A}, \Gamma, K)$  (Algorithm 5)  
**Output:**  $(Q, \sigma_K, \Gamma)$

---



---

**Algorithm 5** Power Method ( $A, V, K$ )

---

**Input:**  $A, V, K$   
**Initial:**  $Q_0 \leftarrow$  Randomly choose  $K$  orthonormal vectors and  $\tau^* = \lceil \log |V| \rceil$   
**for**  $\tau = 1$  **to**  $\tau^*$  **do**  
 $AQ_{\tau-1} = Q_{\tau}R_{\tau}$   
**end for**  
 $\sigma_K \leftarrow K$ -th largest singular value of  $R_{\tau^*}$   
**Output:**  $(Q_{\tau^*}, \sigma_K)$

---

---

**Algorithm 6** Detection ( $Q, V, K$ )

---

**Input:**  $Q, V, K$  (let  $Q_v$  denote the low of  $Q$  corresponding to  $v$ )

**for**  $i = 1$  **to**  $\log |V|$  **do**

$X_{i,v} \leftarrow \{w \in V : \|Q_w - Q_v\|^2 \leq \frac{i}{|V| \log |V|}\}$

$T_{i,0} \leftarrow \emptyset$

**for**  $k = 1$  **to**  $K$  **do**

$v_k^* \leftarrow \arg \max_v |X_{i,v} \setminus \bigcup_{l=1}^{k-1} T_{i,l}|$

$T_{i,k} \leftarrow X_{i,v_k^*} \setminus \bigcup_{l=1}^{k-1} T_{i,l}$  and  $\xi_{i,k} \leftarrow \sum_{v \in T_{i,k}} Q_v / |T_{i,k}|$ .

**end for**

**for**  $v \in V \setminus (\bigcup_{k=1}^K T_{i,k})$  **do**

$k^* \leftarrow \arg \min_k \|Q_v - \xi_{i,k}\|$

$T_{i,k^*} \leftarrow T_{i,k^*} \cup \{v\}$

**end for**

$r_i \leftarrow \sum_{k=1}^K \sum_{v \in T_{i,k}} \|Q_v - \xi_{i,k}\|^2$

**end for**

$i^* \leftarrow \arg \min_i r_i$ .

$S_k \leftarrow T_{i^*,k}$  for all  $k$

**Output:**  $(S_k)_{k=1,\dots,K}$ .

---

## B Proofs

In this section, we provide the proofs of the following theorems.

**Theorem 1** Assume that  $\sqrt{\gamma}f(n) = o(1)$ . Then under any clustering algorithm  $\pi$ , the expected proportion of misclassified green nodes tends to 1/2 as  $n$  grows large, i.e.,  $\lim_{n \rightarrow \infty} \mathbb{E}[\varepsilon^\pi(n^{(g)})] = 1/2$ .

**Theorem 2** (i) If there exists a clustering algorithm that classifies the green nodes asymptotically accurately, then we have:  $\sqrt{\gamma}f(n) = \omega(1)$ .

(ii) If there exists an asymptotically accurate clustering algorithm (i.e., classifying all nodes asymptotically accurately), then we have:  $\gamma f(n) = \omega(1)$ .

**Theorem 4** When  $\sqrt{\gamma}f(n) = \omega(1)$ , Algorithm 1 classifies the green nodes asymptotically accurately.

**Theorem 5** When  $\gamma f(n) = \omega(1)$ , combining Algorithms 1 and 2 yields an asymptotically accurate clustering algorithm.

**Theorem 6** Assume that  $h(n) = \omega(\frac{\log(n)}{\min\{f(n), n^{1/3}\}})$  and  $T = \omega(\frac{n}{\min\{f(n), n^{1/3}\}})$ . Then with  $M = \Theta(nh(n) + n)$  bits, Algorithm 3, with block size  $B = \frac{h(n)n}{\min\{f(n), n^{1/3}\} \log(n)}$  and acquiring the  $T$  first

columns of  $A$ , outputs clusters  $\hat{V}_1, \dots, \hat{V}_K$  such that with high probability, there exists a permutation  $\sigma$  of  $\{1, \dots, K\}$  such that:

$$\frac{1}{n} \left| \bigcup_{1 \leq k \leq K} \hat{V}_k \setminus V_{\sigma(k)} \right| = O \left( \exp \left( -T \frac{\min\{f(n), n^{1/3}\}}{n} \right) \right).$$

In the following, we denote by  $\lambda_i(X)$  the  $i$ -th largest singular value of matrix  $X$ .

## B.1 Proof of Theorem 1

**Preliminaries.** In what follows, we denote by  $\sigma^{(g)} \in \{-1, 1\}^{n^{(g)}}$  a vector that represents the repartition of nodes in the two communities, i.e., nodes  $v$  and  $w$  belong to the same community if and only if  $\sigma_v^{(g)} = \sigma_w^{(g)}$ . We also denote by  $\hat{\sigma}^{(g)} \in \{-1, 1\}^{n^{(g)}}$  the estimate of  $\sigma^{(g)}$  that a clustering algorithm could return.

We further introduce the following notation. For any  $k > 0$  and any two vectors  $x, y \in \{-1, 1\}^k$ , we denote by  $d_H(x, y) = \sum_{i=1}^k 1(x_i \neq y_i)$  the Hamming distance between  $x$  and  $y$  and define

$$d(x, y) = \frac{1}{k} \min\{d_H(x, y), d_H(x, -y)\}.$$

For an estimate  $\hat{\sigma}^{(g)}$  of  $\sigma^{(g)}$ , the quantity  $d(\hat{\sigma}^{(g)}, \sigma^{(g)})$  is exactly the fraction of misclassified green nodes. Hence if estimate  $\hat{\sigma}^{(g)}$  is obtained from algorithm  $\pi$ , we have  $\epsilon^\pi(n^{(g)}) = d(\hat{\sigma}^{(g)}, \sigma^{(g)})$ . Note that  $d(\hat{\sigma}^{(g)}, \sigma^{(g)}) \leq 1/2$ .

We first state key lemmas for this proof. Their proofs are postponed to the end of this section.

**Lemma 7** For any  $\alpha < 1/2$  and estimate  $\hat{\sigma}^{(g)}$ , we have as  $n^{(g)} \rightarrow \infty$

$$\mathbb{P}(d(\hat{\sigma}^{(g)}, \sigma^{(g)}) > \alpha) \geq 1 - \frac{n^{(g)} - H(\sigma^{(g)}|A)}{n^{(g)}(1 - H(\alpha))} + o(1),$$

where  $H(\alpha) = -\alpha \log \alpha - (1 - \alpha) \log(1 - \alpha)$  and  $H(\sigma^{(g)}|A)$  is the conditional entropy of  $\sigma^{(g)}$  knowing  $A$ .

**Lemma 8** As  $n^{(g)} \rightarrow \infty$ , we have:

$$H(A) - H(A|\sigma^{(g)}) \leq o(n^{(g)}) + O(n^{(g)} \gamma f(n)^2).$$

From the definition of conditional entropy, we have

$$H(\sigma^{(g)}|A) = H(\sigma^{(g)}) - H(A) + H(A|\sigma^{(g)}) = n^{(g)}(1 - o(1)), \quad (1)$$

since  $H(\sigma^{(g)}) = \log \binom{n^{(g)}}{n^{(g)}/2} \geq n^{(g)} - \frac{1}{2} \log 2n^{(g)}$  and we have  $H(A) - H(A|\sigma^{(g)}) = o(n^{(g)})$  from Lemma 8. As soon as  $n^{(g)} \rightarrow \infty$ , putting (1) into Lemma 7, we see that for any  $\alpha < 1/2$  and any estimate  $\hat{\sigma}^{(g)}$ ,

$$\mathbb{P}(d(\hat{\sigma}^{(g)}, \sigma^{(g)}) > \alpha) \rightarrow 1.$$

If  $\hat{\sigma}^{(g)}$  is a random guess, i.e. for each  $v \in V^{(g)}$ ,  $\hat{\sigma}_v^{(g)}$  is equal to 1 or  $-1$  with probability  $1/2$  independently of the rest, then for any  $\alpha < 1/2$ , as soon as  $n^{(g)} \rightarrow \infty$ , we have by the weak law of large numbers,  $\mathbb{P}(d(\hat{\sigma}^{(g)}, \sigma^{(g)}) > \alpha) \rightarrow 1$ . Since we have

$$\mathbb{E}[\epsilon^\pi(n^{(g)})] \geq \alpha \mathbb{P}(d(\hat{\sigma}^{(g)}, \sigma^{(g)}) > \alpha),$$

and  $\alpha$  can be chosen as close to  $1/2$  as desired, the result follows.

## B.2 Proof of Lemma 7

We define the event  $E = \{d(\hat{\sigma}^{(g)}, \sigma^{(g)}) > \alpha\}$  and  $P_e$  its probability. We have

$$\begin{aligned} H(E, \sigma^{(g)} | \hat{\sigma}^{(g)}) &= H(\sigma^{(g)} | \hat{\sigma}^{(g)}) + \underbrace{H(E | \sigma^{(g)}, \hat{\sigma}^{(g)})}_0 \\ &= H(E | \hat{\sigma}^{(g)}) + H(\sigma^{(g)} | E, \hat{\sigma}^{(g)}) \\ &\leq H(P_e) + P_e \log \binom{n^{(g)}}{n^{(g)}/2} + (1 - P_e)(n^{(g)} H(\alpha) + \log n^{(g)}), \end{aligned}$$

where the last inequality follows from  $H(E | \hat{\sigma}^{(g)}) \leq H(E) = H(P_e)$  and the fact that

$$|\{\sigma^{(g)}, d(\sigma^{(g)}, \hat{\sigma}^{(g)}) \leq \alpha\}| = \sum_{i=0}^{\alpha n^{(g)}} \binom{n^{(g)}}{i} \leq (n^{(g)} \alpha + 1) \binom{n^{(g)}}{\alpha n^{(g)}} \leq n^{(g)} 2^{n^{(g)} H(\alpha)}.$$

Using  $H(P_e) \leq 1$  and that  $\binom{n^{(g)}}{n^{(g)}/2} \leq 2^{n^{(g)}}$  for sufficiently large  $n^{(g)}$ , we get

$$P_e \geq \frac{H(\sigma^{(g)} | \hat{\sigma}^{(g)}) - 1 - n^{(g)} H(\alpha) - \log n^{(g)}}{n^{(g)}(1 - H(\alpha)) - \log n^{(g)}}.$$

The claim follows from the data processing inequality which ensures  $H(\sigma^{(g)} | \hat{\sigma}^{(g)}) \geq H(\sigma^{(g)} | A)$ .

## B.3 Proof of Lemma 8

Thanks to independence, we have

$$H(A) - H(A | \sigma^{(g)}) = H(A^{(g)}) - H(A^{(g)} | \sigma^{(g)}) + H(A^{(r)}) - H(A^{(r)} | \sigma^{(g)})$$

We first deal with the first term  $H(A^{(g)}) - H(A^{(g)}|\sigma^{(g)})$ . By the concavity of  $p \mapsto H(p)$ , we have  $H(A^{(g)}) \leq \binom{n^{(g)}}{2} H(\frac{p+q}{2})$  and  $H(A^{(g)}|\sigma^{(g)}) = 2\binom{n^{(g)}/2}{2} H(p) + (\frac{n^{(g)}}{2})^2 H(q)$ . Hence, we get

$$\begin{aligned}
H(A^{(g)}) - H(A^{(g)}|\sigma^{(g)}) &\leq \binom{n^{(g)}}{2} H(\frac{p+q}{2}) - 2\binom{n^{(g)}/2}{2} H(p) - (\frac{n^{(g)}}{2})^2 H(q) \\
&= \frac{(n^{(g)})^2}{4} \left( 2H(\frac{p+q}{2}) - H(p) - H(q) \right) + o(n^{(g)}) \\
&= \frac{(n^{(g)})^2}{4} \left( p \log \frac{2p}{p+q} + q \log \frac{2q}{p+q} \right) \\
&\quad + \frac{(n^{(g)})^2}{4} \left( (1-p) \log \frac{2-2p}{2-p-q} + (1-q) \log \frac{2-2q}{2-p-q} \right) + o(n^{(g)}) \\
&\leq \frac{(n^{(g)})^2}{4} \left( \frac{(p-q)^2}{p+q} + \frac{(p-q)^2}{2-p-q} \right) + o(n^{(g)}) \\
&= o(n^{(g)}) + o(n^{(g)} \gamma f(n)).
\end{aligned}$$

We denote by  $A_v^{(r)}$  the row vector of  $A^{(r)}$  corresponding to  $v \in V^{(r)}$ . For the second term, by independence we have

$$H(A^{(r)}) - H(A^{(r)}|\sigma^{(g)}) = (n - n^{(g)}) (H(A_v^{(r)}) - H(A_v^{(r)}|\sigma^{(g)})).$$

For a vector  $x \in \{-1, 1\}^{V^{(g)}}$  and  $\sigma^{(g)}$ , we define  $|x|^+ = \sum_{v \in V^{(g)}, \sigma_v^{(g)}=1} x_v$ ,  $|x|^- = \sum_{v \in V^{(g)}, \sigma_v^{(g)}=-1} x_v$  and  $|x| = |x|^+ + |x|^-$ . For a given  $\sigma^{(g)}$ , we have

$$\mathbb{P}[A_v^{(r)} = x|\sigma^{(g)}] = \zeta(|x|^+, |x|^-),$$

where

$$\zeta(i, j) = \frac{((\frac{p}{1-p})^i (\frac{q}{1-q})^j + (\frac{p}{1-p})^j (\frac{q}{1-q})^i) (1-p)^{\frac{m}{2}} (1-q)^{\frac{m}{2}}}{2}.$$

Since  $\sigma^{(g)}$  is uniformly distributed,

$$\begin{aligned}
\mathbb{P}[A_v^{(g)} = x] &= \binom{n^{(g)}}{n^{(g)}/2}^{-1} \sum_{\sigma^{(g)}: \sum_{v \in V^{(g)}} \sigma_v^{(g)}=0} \mathbb{P}[A_v^{(g)} = x|\sigma^{(g)}] \\
&= \binom{n^{(g)}}{n^{(g)}/2}^{-1} \sum_{i=0}^{|x|} \binom{|x|}{i} \binom{n^{(g)} - |x|}{n^{(g)}/2 - i} \zeta(i, |x| - i) = \eta(|x|),
\end{aligned}$$

where

$$\eta(k) = \frac{\sum_{i=0}^k \binom{n^{(g)}/2}{i} \binom{n^{(g)}/2}{k-i} \zeta(i, k-i)}{\sum_{i=0}^k \binom{n^{(g)}/2}{i} \binom{n^{(g)}/2}{k-i}}.$$

Since  $\eta(0) = \zeta(0, 0)$ ,  $\eta(1) = \zeta(1, 0) = \zeta(0, 1)$ , and  $\binom{n^{(g)}}{k} \eta(k) = \sum_{i=0}^k \binom{n^{(g)}/2}{i} \binom{n^{(g)}/2}{k-i} \zeta(i, k-i)$ ,

$$\begin{aligned}
& H(A_v^{(r)}) - H(A_v^{(r)} | \sigma^{(g)}) \\
&= - \sum_{k=0}^{n^{(g)}} \binom{n^{(g)}}{k} \eta(k) \log \eta(k) + \sum_{i=0}^{n^{(g)}/2} \sum_{j=0}^{n^{(g)}/2} \binom{n^{(g)}/2}{i} \binom{n^{(g)}/2}{j} \zeta(i, j) \log \zeta(i, j) \\
&= \sum_{i=0}^{n^{(g)}/2} \sum_{j=0}^{n^{(g)}/2} \binom{n^{(g)}/2}{i} \binom{n^{(g)}/2}{j} \zeta(i, j) \log \frac{\zeta(i, j)}{\eta(i+j)} \\
&= \sum_{k=2}^{n^{(g)}} \sum_{i=0}^k 1_{i \leq n^{(g)}/2} 1_{k-i \leq n^{(g)}/2} \binom{n^{(g)}/2}{i} \binom{n^{(g)}/2}{k-i} \zeta(i, k-i) \log \frac{\zeta(i, k-i)}{\eta(k)} \\
&\leq \sum_{k=2}^{n^{(g)}} \sum_{i=0}^k 1_{i \leq n^{(g)}/2} 1_{k-i \leq n^{(g)}/2} \binom{n^{(g)}/2}{i} \binom{n^{(g)}/2}{k-i} \zeta(i, k-i) k \log \left( \frac{p}{q} \right) \\
&\leq \sum_{2 \leq k \leq n^{(g)}} (n^{(g)} p)^k k \log \left( \frac{a}{b} \right) \\
&= O((n^{(g)})^2 p^2),
\end{aligned}$$

where the last equality stems from  $n^{(g)} p = o(1)$ . Thus,

$$(n-m)(H(A_v^{(r)}) - H(A_v^{(r)} | \sigma^{(g)})) = O(n(n^{(g)})^2 p^2) = O(n^{(g)} \frac{n^{(g)}}{n} f(n)^2) = O(n^{(g)} \gamma f(n)^2),$$

and the lemma follows since  $f(n) \geq 1$  so that  $f(n)^2 \geq f(n)$ .

## B.4 Proof of Theorem 2

In the remaining proofs, we use  $m$  instead of  $n^{(g)}$  to denote the number of green nodes. We first consider case (i) with  $\gamma = \Theta(1)$ . In this case, a necessary condition for the existence of an asymptotically accurate clustering algorithm is that the fraction of green nodes outside the largest connected component of the observed graph vanishes as  $n \rightarrow \infty$ . This condition imposes that  $f(n) \rightarrow \infty$ .

We now consider case (i) with  $m = o(n)$ , i.e.  $\gamma = o(1)$ . Denote by  $\Phi$  the true hidden partition  $(V_1^{(g)}, V_2^{(g)})$  for green nodes. Let  $\mathbb{P}_\Phi$  be the probability measure capturing the randomness in the observations assuming that the network structure is described by  $\Phi$ . We also introduce a slightly different structure  $\Psi$ . The latter is described by clusters  $V_1'^{(g)} = V_1^{(g)} \cup \{v_2\} \setminus \{v_1\}$ ,  $V_2'^{(g)} = V_2^{(g)} \cup \{v_1\} \setminus \{v_2\}$  with arbitrary selected  $v_1 \in V_1^{(g)}$  and  $v_2 \in V_2^{(g)}$ .

Let  $\pi \in \Pi$  denote a clustering algorithm for green nodes with output  $(\hat{V}_1^{(g)}, \hat{V}_2^{(g)})$ , and let  $\mathcal{E} = \hat{V}_1^{(g)} \triangle V_1^{(g)}$  be the set of misclassified nodes under  $\pi$ . Note that in general in our proofs, we

always assume without loss of generality that  $|\hat{V}_1^{(g)} \triangle V_1^{(g)}| \leq |\hat{V}_1^{(g)} \triangle V_2^{(g)}|$ , so that the set of misclassified nodes is really  $\mathcal{E}$ . Further define  $\mathcal{B} = \{v_1 \in \hat{V}_1^{(g)}\}$  as the set of events where node  $v_1$  is correctly classified. We have  $\varepsilon(m) = |\mathcal{E}|/m$ .

Let  $x_{i,j}$  be equal to one if there is an edge between nodes  $i$  and  $j$  and zero otherwise. With a slight abuse of notation, we define the boolean functions  $p(\cdot)$  and  $q(\cdot)$  as follows:  $p(1) = af(n)/n = p$ ,  $q(1) = bf(n)/n = q$  and  $p(0) = 1 - p(1)$ ,  $q(0) = 1 - q(1)$ . We introduce  $L$  (a quantity that resembles the log-likelihood ratio between  $\mathbb{P}_\Phi$  and  $\mathbb{P}_\Psi$ ) as:

$$L = \sum_{i \in V_1^{(g)}} \log \frac{q(x_{i,v_1})p(x_{i,v_2})}{p(x_{i,v_1})q(x_{i,v_2})} + \sum_{i \in V_2^{(g)}} \log \frac{p(x_{i,v_1})q(x_{i,v_2})}{q(x_{i,v_1})p(x_{i,v_2})} \\ + \sum_{v \in V^{(r)}} \log \frac{\prod_{i \in V_1^{(g)}} p(x_{v,i}) \prod_{i \in V_2^{(g)}} q(x_{v,i}) + \prod_{i \in V_1^{(g)}} q(x_{v,i}) \prod_{i \in V_2^{(g)}} p(x_{v,i})}{\prod_{i \in V_1^{(g)}} p(x_{v,i}) \prod_{i \in V_2^{(g)}} q(x_{v,i}) + \prod_{i \in V_1^{(g)}} q(x_{v,i}) \prod_{i \in V_2^{(g)}} p(x_{v,i})},$$

In what follows, we establish a relationship between  $\mathbb{E}[\varepsilon(m)]$  and  $L$ . For any function  $g(m)$ ,

$$\mathbb{P}_\Psi\{L \leq g(m)\} = \mathbb{P}_\Psi\{L \leq g(m), \bar{\mathcal{B}}\} + \mathbb{P}_\Psi\{L \leq g(m), \mathcal{B}\}. \quad (2)$$

We have:

$$\begin{aligned} \mathbb{P}_\Psi\{L \leq g(m), \bar{\mathcal{B}}\} &= \int_{\{L \leq g(m), \bar{\mathcal{B}}\}} d\mathbb{P}_\Psi \\ &= \int_{\{L \leq g(m), \bar{\mathcal{B}}\}} \prod_{i \in V_1^{(g)}} \frac{\nu(x_{i,v_1})\nu(x_{i,v_2})}{p(x_{i,v_1})q(x_{i,v_2})} \prod_{i \in V_2^{(g)}} \frac{\nu(x_{i,v_1})\nu(x_{i,v_2})}{q(x_{i,v_1})p(x_{i,v_2})} d\mathbb{P}_\Phi \\ &\leq \exp(g(m)) \mathbb{P}_\Phi\{L \leq g(m), \bar{\mathcal{B}}\} \leq \exp(g(m)) \mathbb{P}_\Phi\{\bar{\mathcal{B}}\} \\ &\leq 2 \exp(g(m)) \mathbb{E}_\Phi[\varepsilon(m)], \end{aligned} \quad (3)$$

where the last inequality comes from the fact that,

$$\mathbb{P}_\Phi\{\mathcal{B}\} \geq 1 - \mathbb{P}_\Phi\{v_1 \notin \hat{V}_1^{(g)}\} \geq 1 - 2\mathbb{E}_\Phi[\varepsilon(n)].$$

We also have:

$$\mathbb{P}_\Psi\{L \leq g(m), \mathcal{B}\} \leq \mathbb{P}_\Psi\{\mathcal{B}\} \leq 2\mathbb{E}_\Psi[\varepsilon(m)]. \quad (4)$$

By (3) and (4)

$$\mathbb{P}_\Psi\{L \leq g(n)\} \leq 2\mathbb{E}_\Phi[\varepsilon(n)] \exp(g(n)) + 2\mathbb{E}_\Psi[\varepsilon(n)].$$

Since  $\mathbb{E}_\Phi[\varepsilon(n)] = \mathbb{E}_\Psi[\varepsilon(n)] = \mathbb{E}[\varepsilon(n)]$  and  $\mathbb{E}[\varepsilon(n)] = o(1)$ , choosing  $g(m) = \log\left(\frac{1}{8\mathbb{E}[\varepsilon(m)]}\right)$ , we obtain:

$$\liminf_{m \rightarrow \infty} \mathbb{P}_\Psi\{L \geq \log\left(\frac{1}{8\mathbb{E}[\varepsilon(m)]}\right)\} > \frac{1}{2}. \quad (5)$$

By Chebyshev's inequality,  $\mathbb{P}_\Psi\{L \geq \mathbb{E}_\Psi[L] + 2\sigma_\Psi[L]\} \leq \frac{1}{4}$ . Therefore, to be valid the above inequality,

$$\mathbb{E}_\Psi[L] + 2\sigma_\Psi[L] \geq \log\left(\frac{1}{8\mathbb{E}[\varepsilon(m)]}\right), \quad (6)$$

which implies that  $\mathbb{E}_\Psi[L] + 2\sigma_\Psi[L] = \omega(1)$  since  $\mathbb{E}[\varepsilon(m)] = o(1)$ .

We define  $KL(p, q) = p \log(p/q) + (1-p) \log((1-p)/(1-q))$ . From the definition of  $L$ , we can easily bound  $\mathbb{E}_\Psi[L]$  and  $\sigma_\Psi[L]^2$ :

$$\begin{aligned} \mathbb{E}_\Psi[L] &\leq m \cdot (KL(p, q) + KL(q, p)) \\ &\quad + n \sum_{0 \leq i, j \leq \frac{m}{2}-1} \binom{m/2-1}{i} \binom{m/2-1}{j} \frac{p^{i+1}q^j + p^j q^{i+1}}{2} \log \frac{p^{i+1}q^j + p^j q^{i+1}}{p^i q^{j+1} + p^{j+1} q^i} \\ &\leq m \cdot (KL(p, q) + KL(q, p)) + n \sum_{1 \leq k \leq m} m^k p^{k+1} k \log \frac{p}{q} \\ &\leq O(\gamma f(n)) + np \log \frac{a}{b} \sum_{1 \leq k \leq m} k m^k p^k \leq O(\gamma f(n)) + np \log \frac{a}{b} \sum_{k=1}^{\infty} k (mp)^k \\ &\leq O(\gamma f(n)) + np \log \frac{a}{b} \sum_{k=1}^{\infty} (2mp)^k \\ \sigma_\Psi[L]^2 &\leq m((p+q)(\log \frac{a}{b})^2 + (2-p-q)(\log \frac{1-q}{1-p})^2) \\ &\quad + n \sum_{0 \leq i, j \leq \frac{m}{2}-1} \binom{m/2-1}{i} \binom{m/2-1}{j} \frac{p^{i+1}q^j + p^j q^{i+1}}{2} \left( \log \frac{p^{i+1}q^j + p^j q^{i+1}}{p^i q^{j+1} + p^{j+1} q^i} \right)^2 \\ &\leq 4mp(\log \frac{a}{b})^2 + n \sum_{1 \leq k \leq m} m^k p^{k+1} k^2 (\log \frac{a}{b})^2 \\ &\leq O(\gamma f(n)) + np(\log \frac{a}{b})^2 \sum_{k=1}^{\infty} k^2 (mp)^k \leq O(\gamma f(n)) + np(\log \frac{a}{b})^2 \sum_{k=1}^{\infty} (3mp)^k. \quad (7) \end{aligned}$$

Therefore, the necessary condition for  $\mathbb{E}_\Psi[L] + 2\sigma_\Psi[L] = \omega(1)$  is that  $np \sum_{k=1}^{\infty} (3mp)^k = \omega(1)$ . We conclude this proof from that  $np \sum_{k=1}^{\infty} (3mp)^k = \omega(1)$  if and only if  $\gamma f(n)^2 = \omega(1)$ .

We now prove point (ii). Note that the probability for a red node to be isolated is at least  $(1 - af(n)/n)^{\gamma n} \approx \exp(-a\gamma f(n))$ . If there exists an asymptotically accurate clustering algorithm, then the fraction of such isolated red nodes should vanishes and hence  $\gamma f(n) \rightarrow \infty$ .

## B.5 Proof of Theorem 4

The proof proceeds in two steps. Step 1. We first establish that if  $\frac{\sigma_K^{(g)}}{\sqrt{m\hat{p}^{(g)}}} \cdot 1_{\{m\hat{p}^{(g)} \geq 50\}} = \omega(1)$ , then the spectral method applied to the matrix  $A^{(g)}$  is asymptotically accurate. We also show that



if  $\frac{\sigma'_K}{\sqrt{m\hat{p}'}} \cdot 1_{\{m\hat{p}' \geq 50\}} = \omega(1)$ , then the spectral method applied to the matrix of indirect edges  $A'$  is asymptotically accurate. Step 2. We show that if  $\gamma f(n) = \omega(1)$ , then  $\frac{\sigma_K^{(g)}}{\sqrt{m\hat{p}^{(g)}}} \cdot 1_{\{m\hat{p}^{(g)} \geq 50\}} = \omega(1)$  with high probability (w.h.p.), and if  $\gamma f(n) = O(1)$  and  $\sqrt{\gamma} f(n) = \omega(1)$ , then  $\frac{\sigma'_K}{\sqrt{m\hat{p}'}} \cdot 1_{\{m\hat{p}' \geq 50\}} = \omega(1)$  w.h.p..

**Preliminaries.** We first state three lemmas to analyze the performance of Approx, PowerMethod, and Detection algorithms. Their proofs are postponed to the end of this section. In what follows, let  $V = \{1, \dots, n\}$  and let  $A \in \mathbb{R}^{n \times n}$ . For any matrix  $Z \in \mathbb{R}^{n \times n}$ ,  $\lambda_K(Z)$  denotes the  $K$ -th largest singular value of  $Z$ .

**Lemma 9** *With probability  $1 - O(1/n)$ , the output  $(Q, \sigma_K)$  of the PowerMethod algorithm with input  $(A, V, K)$  (Algorithm 5) satisfies that  $\sigma_K = \Theta(\lambda_K(A))$ .*

**Lemma 10** *Let  $A, M \in \mathbb{R}^{n \times n}$  and let  $M = U\Lambda U^T$  be the SVD of  $M$  where  $\Lambda \in \mathbb{R}^{K \times K}$ . Assume that  $\|A - M\| = o(\lambda_K(M))$ , the output  $(Q, \sigma_K)$  of the PowerMethod algorithm (Algorithm 5) with input  $(A, V, K)$  satisfies:*

$$\|U_{\perp}^T Q\| = O\left(\frac{\|A - M\|}{\lambda_K(M)}\right) = o(1),$$

where  $U_{\perp}$  is an orthonormal basis of the space perpendicular to the linear span of  $U$ .

**Lemma 11** *Assume that the set  $V$  is partitioned into  $K$  subsets  $(V_k)_{1 \leq k \leq K}$ . Further assume that for any  $k$ ,  $\frac{|V_k|}{n} > 0$  does not depend on  $n$ . Let  $W$  be the  $V \times K$  matrix with for all  $(v, k)$ ,  $W_{vk} = 1/\sqrt{|V_k|}$  if  $v \in V_k$  and 0 otherwise. Let  $W_{\perp}$  be an orthonormal basis of the space perpendicular to the linear span of  $W$ . The output  $(S_k)_{1 \leq k \leq K}$  of the Detection algorithm with input  $(Q, V, K)$  satisfies: if  $\|W_{\perp}^T Q\| = o(1)$ , then there exists a permutation  $\zeta$  of  $\{1, \dots, K\}$  such that*

$$\frac{\left| \bigcup_{k=1}^K S_k \setminus V_{\zeta(k)} \right|}{n} = O(\|W_{\perp}^T Q\|^2).$$

**Step 1.** We use the notations introduced in the pseudo-codes of the various algorithms. Let  $M^{(g)} = \mathbb{E}[A^{(g)}]$  and  $M' = \mathbb{E}[A']$ . Let  $A_{\Gamma}^{(g)} = (A_{vw}^{(g)})_{v,w \in \Gamma^{(g)}}$  and  $M_{\Gamma}^{(g)} = (M_{vw}^{(g)})_{v,w \in \Gamma^{(g)}}$ . Analogously, we define  $A'_{\Gamma} = (A'_{vw})_{v,w \in \Gamma'}$  and  $M'_{\Gamma} = (M'_{vw})_{v,w \in \Gamma'}$ .

We prove that if  $\frac{\sigma'_K}{\sqrt{m\hat{p}'}} \cdot 1_{\{m\hat{p}' \geq 50\}} = \omega(1)$ , then the spectral method applied to the matrix of indirect edges  $A'$  is asymptotically accurate. We omit the proof of the asymptotic accuracy of the spectral method applied to  $A^{(g)}$  under the condition  $\frac{\sigma_K^{(g)}}{\sqrt{m\hat{p}^{(g)}}} \cdot 1_{\{m\hat{p}^{(g)} \geq 50\}} = \omega(1)$  (since it can be conducted in the same way).

Recall that  $\sigma'_K$  denotes the  $K$ -th largest singular value of the trimmed matrix  $A'_\Gamma$ . Observe that by assumption, for  $n$  large enough,  $m\hat{p}' \geq 50$ . Hence applying the law of large numbers, we can conclude that the largest singular value  $\xi_1$  of  $A'$  scales at most as  $m\hat{p}'$  w.h.p.. Since  $\sigma'_K \leq \sigma'_1 \leq \xi_1$  (where  $\sigma'_1$  is the largest singular value of  $A'_\Gamma$ ) and  $\frac{\sigma'_K}{\sqrt{m\hat{p}'}} = \omega(1)$ , we deduce that  $m\hat{p}' = \omega(1)$  w.h.p.. Hence the trimming step in the Approx algorithm applied to  $(A', \hat{p}', V^{(g)}, K)$  does remove a negligible proportion of green nodes, i.e., w.h.p.  $|V^{(g)} \setminus \Gamma| = o(|V^{(g)}|)$  or equivalently  $|\Gamma| = m(1 + o(1))$ .

Observe that w.h.p.,  $\hat{p}' = \frac{\sum_{u,v} M'_{uv}}{m^2} (1 + o(1)) = \Theta(\max_{uv} \{M'_{uv}\}) (1 + o(1))$  by the law of large numbers and  $\sum_{w \in \Gamma'} A'_{vw} = O(m\hat{p}')$  for all  $v \in \Gamma'$ . From random matrix theory [2], with probability  $1 - O(1/m)$ ,  $\|A'_\Gamma - M'_\Gamma\| = O(\sqrt{m\hat{p}'})$ . Next we apply Lemma 9 to  $(A'_\Gamma, \Gamma', K)$  and deduce that  $\sigma'_K = \Theta(\lambda_K(A'_\Gamma))$  w.h.p.. From  $\lambda_K(M'_\Gamma) \geq \lambda_K(A'_\Gamma) - \|A'_\Gamma - M'_\Gamma\|$ , and  $\frac{\sigma'_K}{\sqrt{m\hat{p}'}} = \omega(1)$ , we deduce that w.h.p.,

$$\frac{\lambda_K(M'_\Gamma)}{\|A'_\Gamma - M'_\Gamma\|} = \omega(1).$$

If  $M'_\Gamma = U\Lambda U^T$ , we deduce from Lemma 10 applied to  $A'_\Gamma$  and  $M'_\Gamma$  that w.h.p.,  $\|U_\perp^T Q\| = o(1)$ . We can now apply Lemma 11 replacing  $V$  by  $\Gamma'$  and  $V_k$  by  $\Gamma' \cap V_k^{(g)}$ . Observe that the linear span of  $U$  coincides with that of  $W$  (refer to Lemma 11 for the definition of  $W$ ). Hence, w.h.p., the nodes  $\Gamma'$  are accurately classified, and so are the nodes in  $V^{(g)}$ .

**Step 2.** We distinguish two cases: 1.  $\gamma f(n) = \omega(1)$ ; 2.  $\gamma f(n) = O(1)$  and  $\sqrt{\gamma} f(n) = \omega(1)$ .

**Case 1.** Assume that  $\gamma f(n) = \omega(1)$ . By the law of large numbers,  $m\hat{p}^{(g)} = \Theta(\gamma f(n))$  w.h.p.. Since  $\lambda_K(M_\Gamma^{(g)}) = \Omega(\gamma f(n))$ ,  $\|A_\Gamma^{(g)} - M_\Gamma^{(g)}\| = \Theta(\sqrt{m\hat{p}^{(g)}}) = \Theta(\sqrt{\gamma f(n)})$  and  $\lambda_K(A_\Gamma^{(g)}) \geq \lambda_K(M_\Gamma^{(g)}) - \|A_\Gamma^{(g)} - M_\Gamma^{(g)}\|$ , we get  $\frac{\lambda_K(A_\Gamma^{(g)})}{\sqrt{m\hat{p}^{(g)}}} = \omega(1)$  w.h.p.. Since  $\sigma_K^{(g)} = \Theta(\lambda_K(A_\Gamma^{(g)}))$  from Lemma 9, w.h.p.

$$\frac{\sigma_K^{(g)}}{\sqrt{m\hat{p}^{(g)}}} \cdot 1_{\{m\hat{p}^{(g)} \geq 50\}} = \omega(1).$$

**Case 2.** Assume that  $\gamma f(n) = O(1)$  and  $\sqrt{\gamma} f(n) = \omega(1)$ . We first compute  $M'_{ij}$  for any  $i, j \in V^{(g)}$ . For notational simplicity,  $\alpha_k = \frac{|V_k^{(g)}|}{n}$  and  $\beta_k = \frac{|V_k^{(r)}|}{n}$ .

(i) Let  $i, j$  be two green nodes belonging to the same community, i.e.,  $i, j \in V_k^{(g)}$ . Let  $v \in V_k^{(r)}$ . We have:

$$\mathbb{P} \left[ A_{vi} = 1 = A_{vj}, \sum_{w \in V^{(g)}} A_{vw} = 2 \right] = p^2 (1-p)^{\alpha_k n - 2} \prod_{l \neq k} (1-q)^{\alpha_l n}.$$

This probability is equivalent to  $p^2 \exp(-\alpha_k p n - \sum_{l \neq k} \alpha_l q n)$  when  $n \rightarrow \infty$ . Similarly, when  $v \in V_{k'}^{(g)}$  for some  $k' \neq k$ , the probability  $\mathbb{P}[A_{vi} = 1 = A_{vj}, \sum_{w \in V^{(g)}} A_{vw} = 2]$  is equivalent to

$q^2 \exp(-\alpha_{k'}pn - \sum_{l \neq k'} \alpha_l qn)$  when  $n \rightarrow \infty$ . We deduce that:

$$M'_{ij} \sim p^2 n \beta_k \eta_k + q^2 n \sum_{k' \neq k} \beta_{k'} \eta_{k'}, \quad \text{as } n \rightarrow \infty, \quad (8)$$

where  $\eta_k = \exp(-\alpha_k pn - \sum_{l \neq k} \alpha_l qn)$ .

(ii) Let  $i, j$  be two green nodes belonging to different communities, i.e.,  $i \in V_k^{(g)}$  and  $j \in V_\ell^{(g)}$ , for  $k \neq \ell$ . Using the same analysis as above, we have:

$$M'_{ij} \sim pq(\beta_k \eta_k + \beta_\ell \eta_\ell)n + q^2 n \sum_{k' \notin \{k, \ell\}} \beta_{k'} \eta_{k'} \quad \text{as } n \rightarrow \infty. \quad (9)$$

From (8)-(9) and the law of large numbers, we get w.h.p.,  $m\hat{p}' = \Theta(\gamma f(n)^2)$  (this comes from the facts that  $\gamma f(n) = O(1)$  and  $\alpha_k pn = \Theta(\gamma pn) = \Theta(\gamma f(n))$ ). As a consequence,  $m\hat{p}' = \omega(1)$  w.h.p.. Thus, in the trimming process in the Approx algorithm applied to  $(A', \hat{p}', V^{(g)}, K)$ , we must have  $|V^{(g)} \setminus \Gamma'| = o(|V^{(g)}|)$  w.h.p..

We also deduce from the above analysis that we can represent  $M'_\Gamma$  as follows:

$$M'_\Gamma = M_{\Gamma', K}^{(g)} \Lambda' (M_{\Gamma', K}^{(g)})^T,$$

where  $M_{\Gamma', K}^{(g)}$  is a  $\Gamma' \times K$  matrix where the  $k$ -th column of  $M_{\Gamma', K}^{(g)}$  is the column vector of  $M_\Gamma^{(g)}$  corresponding to  $v \in V_k^{(g)}$ , and  $\Lambda'$  is a  $K \times K$  diagonal matrix where  $k$ -th element is  $\beta_k \eta_k n$ . Since  $\frac{\|M_{\Gamma', K}^{(g)} \mathbf{x}\|}{\|\mathbf{x}\|} = \Omega(\sqrt{mp})$  for any  $\mathbf{x} \in \mathbb{R}^{K \times 1}$ ,  $\lambda_K(M'_\Gamma) = \Omega(mnp^2 \min_{1 \leq k \leq K} \eta_k) = \Omega(\gamma f(n)^2)$ . By the law of large numbers, w.h.p.,  $m\hat{p}' = \Theta(\gamma f(n)^2)$ . Then, as in the analysis of Case 1, we conclude that w.h.p.

$$\frac{\sigma'_K}{\sqrt{m\hat{p}'}} \cdot 1_{\{m\hat{p}' \geq 50\}} = \omega(1).$$

## B.6 Proof of Lemma 9

To conclude  $\sigma_K = \Theta(\lambda_K(A))$ , we show that  $\sigma_K = O(\lambda_K(A))$  (Step 1) and  $\sigma_K = \Omega(\lambda_K(A))$  (Step 2).

**Step 1.** When  $\|A\| = \Theta(\lambda_K(A))$ , this is trivial since singular values of  $R_{\tau^*}$  have to be less than  $\|A\|$ . Let  $\|A\| = \omega(\lambda_K(A))$ . Then, there exists  $\ell < K$  such that  $\lambda_\ell(A) = \omega(\lambda_K(A))$  and  $\lambda_{\ell+1}(A) = \Theta(\lambda_K(A))$ . We denote by  $\tilde{U}_j \tilde{\Lambda} \tilde{U}_j^T$  be the SVD of rank  $j$  approximation of  $A$ . Let  $Q_{K, \tau^*}$  denote the  $K$ -th column vector of  $Q_{\tau^*}$ . Analogously with Step 1 of the proof of Lemma 10, we can show that  $\|\tilde{U}_j^T Q_{K, \tau^*}\| = O(\frac{\lambda_K(A)}{\lambda_j(A)})$  for all  $j \leq \ell$ . Therefore,  $\sigma_k = O(\lambda_K(A))$ .

**Step 2.** When  $\lambda_n(A) = \Theta(\lambda_K(A))$ , this is trivial since singular values of  $R_{\tau^*}$  have to be larger than  $\lambda_n(A)$ . Let  $\lambda_n(A) = o(\lambda_K(A))$ . Then, there exists  $\ell \geq K$  such that  $\lambda_{\ell+1}(A) = o(\lambda_K(A))$

and  $\lambda_\ell(A) = \Theta(\lambda_K(A))$ . Analogously with Step 1 of the proof of Lemma 10, we can show that  $\|(\tilde{U}_\ell)_\perp^T Q_{K,\tau^*}\| = O(\frac{\lambda_{\ell+1}(A)}{\lambda_\ell(A)}) = o(1)$ , where  $(\tilde{U}_\ell)_\perp$  is an orthonormal basis of the perpendicular to the linear span of  $\tilde{U}_\ell$ . Therefore,  $\sigma_k = \Omega(\lambda_\ell(A)) = \Omega(\lambda_K(A))$ .

## B.7 Proof of Lemma 10

We denote by  $\tilde{A} = \tilde{U}\tilde{\Lambda}\tilde{U}^T$  be the SVD of rank  $K$  approximation of  $A$ . Let  $U_\perp$  and  $\tilde{U}_\perp$  be orthonormal bases of the perpendicular spaces to the linear spans of  $U$  and  $\tilde{U}$ , respectively. Since

$$\begin{aligned}\|U_\perp^T Q_{\tau^*}\| &= \|U_\perp^T(\tilde{U}\tilde{U}^T + \tilde{U}_\perp\tilde{U}_\perp^T)Q_{\tau^*}\| \leq \|U_\perp^T\tilde{U}\tilde{U}^T Q_{\tau^*}\| + \|U_\perp^T\tilde{U}_\perp\tilde{U}_\perp^T Q_{\tau^*}\| \\ &\leq \|U_\perp^T\tilde{U}\| \|\tilde{U}^T Q_{\tau^*}\| + \|U_\perp^T\tilde{U}_\perp\| \|\tilde{U}_\perp^T Q_{\tau^*}\| \leq \|U_\perp^T\tilde{U}\| + \|\tilde{U}_\perp^T Q_{\tau^*}\|,\end{aligned}$$

to conclude this proof, we will show that  $\|\tilde{U}_\perp^T Q_{\tau^*}\| = O\left(\frac{\|A-M\|}{\lambda_K(M)}\right)$  and  $\|U_\perp^T\tilde{U}\| = O\left(\frac{\|A-M\|}{\lambda_K(M)}\right)$ .

**Step 1.**  $\|\tilde{U}_\perp^T Q_{\tau^*}\| = O\left(\frac{\|A-M\|}{\lambda_K(M)}\right)$ : Let  $\mathbf{x}_1$  be the right singular vector of  $\tilde{U}_\perp^T Q_{\tau+1}$  corresponding to the largest singular value and  $\tilde{\mathbf{x}}_1$  be a  $K \times 1$  vector such that  $\mathbf{x}_1 = R_{\tau+1}\tilde{\mathbf{x}}_1$ . Then,

$$\begin{aligned}\|\tilde{U}_\perp^T Q_{\tau+1}\|_2^2 &= \frac{\|\tilde{U}_\perp^T Q_{\tau+1}\mathbf{x}_1\|_2^2}{\|\mathbf{x}_1\|_2^2} = \frac{\|\tilde{U}_\perp^T Q_{\tau+1}R_{\tau+1}\tilde{\mathbf{x}}_1\|_2^2}{\|R_{\tau+1}\tilde{\mathbf{x}}_1\|_2^2} \\ &= \frac{\|\tilde{U}_\perp^T Q_{\tau+1}R_{\tau+1}\tilde{\mathbf{x}}_1\|_2^2}{\|\tilde{U}^T Q_{\tau+1}R_{\tau+1}\tilde{\mathbf{x}}_1\|_2^2 + \|\tilde{U}_\perp^T Q_{\tau+1}R_{\tau+1}\tilde{\mathbf{x}}_1\|_2^2} \\ &= \frac{\|\tilde{U}_\perp^T A Q_\tau \tilde{\mathbf{x}}_1\|_2^2}{\|\tilde{U}^T A Q_\tau \tilde{\mathbf{x}}_1\|_2^2 + \|\tilde{U}_\perp^T A Q_\tau \tilde{\mathbf{x}}_1\|_2^2} \\ &\leq \frac{\|A-M\|_2^2}{(\lambda_K(M) - \|A-M\|_2)^2(1 - \|\tilde{U}_\perp^T Q_\tau\|_2^2) + \|A-M\|_2^2},\end{aligned}\tag{10}$$

where the last inequality stems from that

$$\begin{aligned}\|\tilde{U}_\perp^T A Q_\tau \tilde{\mathbf{x}}_1\|_2 &\leq \|\tilde{U}_\perp^T A\| \|Q_\tau\| \|\tilde{\mathbf{x}}_1\|_2 \leq \|\tilde{U}_\perp^T A\| \|\tilde{\mathbf{x}}_1\|_2 = \lambda_{K+1}(A) \|\tilde{\mathbf{x}}_1\|_2 \leq \|(A-M)\| \|\tilde{\mathbf{x}}_1\|_2 \\ \|\tilde{U}^T A Q_\tau \tilde{\mathbf{x}}_1\|_2 &= \|(\tilde{U}^T A \tilde{U} \tilde{U}^T Q_\tau + \tilde{U}^T A \tilde{U}_\perp \tilde{U}_\perp^T Q_\tau) \tilde{\mathbf{x}}_1\|_2 = \|\tilde{U}^T A \tilde{U} \tilde{U}^T Q_\tau \tilde{\mathbf{x}}_1\|_2 \\ &\geq \lambda_K(A) \|\tilde{U}^T Q_\tau \tilde{\mathbf{x}}_1\|_2 \geq (\lambda_K(M) - \|A-M\|) \|\tilde{U}^T Q_\tau \tilde{\mathbf{x}}_1\|_2 \\ &\geq (\lambda_K(M) - \|A-M\|) \sqrt{1 - \|\tilde{U}_\perp^T Q_\tau\|_2^2} \|\tilde{\mathbf{x}}_1\|_2.\end{aligned}$$

Let  $\zeta = \frac{\|A-M\|_2^2}{(\lambda_K(M) - \|A-M\|_2)^2}$ . Since  $\frac{\|A-M\|_2}{\lambda_K(M)} = o(1)$ ,  $\zeta = O(\frac{\|A-M\|_2^2}{\lambda_K(M)^2}) = o(1)$ . Then, from (10),

$$1 - \|\tilde{U}_\perp^T Q_{\tau+1}\|_2^2 \geq 1 - \frac{\zeta}{1 - \|\tilde{U}_\perp^T Q_\tau\|_2^2 + \zeta} = \frac{1 - \|\tilde{U}_\perp^T Q_\tau\|_2^2}{1 - \|\tilde{U}_\perp^T Q_\tau\|_2^2 + \zeta}.$$

When  $1 - \|\tilde{U}_\perp^T Q_\tau\|_2^2 \leq \zeta$ ,  $1 - \|\tilde{U}_\perp^T Q_{\tau+1}\|_2^2 \geq \frac{1 - \|\tilde{U}_\perp^T Q_\tau\|_2^2}{2\zeta}$ . From this, one can easily check that when  $\tau \geq \frac{\log(\zeta/(1 - \|\tilde{U}_\perp^T Q_0\|_2^2))}{\log(1/2\zeta)}$ ,  $1 - \|\tilde{U}_\perp^T Q_\tau\|_2^2 \geq \zeta$ ,  $1 - \|\tilde{U}_\perp^T Q_{\tau+1}\|_2^2 \geq 1/2$ , and  $1 - \|\tilde{U}_\perp^T Q_{\tau+2}\|_2^2 \geq 1 - 2\zeta$ . Therefore, when  $\frac{\log |V|}{2} \geq \frac{\log(\zeta/(1 - \|\tilde{U}_\perp^T Q_0\|_2^2))}{\log(1/2\zeta)}$ ,  $\|\tilde{U}_\perp^T Q_{\tau^*}\|_2 = O\left(\frac{\|A-M\|}{\lambda_K(M)}\right)$ . Since  $\zeta = o(1)$ , to complete this proof, it is sufficient to show that  $1 - \|\tilde{U}_\perp^T Q_0\|_2^2 \geq 1/\text{Poly}(n)$  with probability  $1 - O(1/n)$ , where  $\text{Poly}(n)$  is a polynomial function of  $n$  with finite order. By Theorem 1.2 of [4] (Please refer to the proof of Lemma 10 of [3]) we can conclude this part with  $\text{Poly}(n) = 1/n^4$ .

**Step 2.**  $\|U_\perp^T \tilde{U}\| = O\left(\frac{\|A-M\|}{\lambda_K(M)}\right)$ : We can get an upper bound and a lower bound for  $\|AU_\perp\|$  as follows:

$$\begin{aligned} \|AU_\perp\| &= \|(M + A - M)U_\perp\| = \|(A - M)U_\perp\| \leq \|A - M\| \\ \|AU_\perp\| &= \|(\tilde{A} + A - \tilde{A})U_\perp\| \geq \|\tilde{A}U_\perp\| - \|(A - \tilde{A})U_\perp\| \geq \|\tilde{U}\tilde{\Lambda}\tilde{U}^T U_\perp\| - \|A - \tilde{A}\| \\ &\geq \lambda_K(A)\|\tilde{U}^T U_\perp\| - \|A - \tilde{A}\| \geq (\lambda_K(M) - \|A - M\|)\|\tilde{U}^T U_\perp\| - \|A - M\|. \end{aligned}$$

When we combine above bounds,  $\|\tilde{U}^T U_\perp\| \leq \frac{2\|A-M\|}{(\lambda_K(M) - \|A-M\|)} = O\left(\frac{\|A-M\|}{\lambda_K(M)}\right)$ .

## B.8 Proof of Lemma 11

From the definitions of  $W$  and  $W_\perp$ ,  $Q = WW^T Q + W_\perp W_\perp^T Q$ . Since rows of  $W$  corresponding to the nodes from the same cluster are the same, the rows of  $WW^T Q$  are also the same for the node from the same clusters. Let  $WW^T Q(k)$  be the rows of  $WW^T Q$  corresponding to  $v \in V_k$ . Let  $\mathbf{v}_{(k\ell)} \in \mathbb{R}^{K \times 1}$  such that  $k$ -th row and  $\ell$ -th row are  $1/\sqrt{|V_k|}$  and  $-1/\sqrt{|V_\ell|}$ , respectively and other elements are zero. Then,  $\|WW^T Q(k) - WW^T Q(\ell)\|^2 = \|W^T Q \mathbf{v}_{(k\ell)}\|^2$ . Since  $\|W^T Q \mathbf{x}\| \geq \sqrt{1 - \|W_\perp^T Q\|^2} \|\mathbf{x}\|$ ,

$$\|WW^T Q(k) - WW^T Q(\ell)\|^2 = \Omega\left(\frac{1 - \|W_\perp^T Q\|^2}{n}\right) = \Omega\left(\frac{1}{n}\right) \quad \text{for all } k \neq \ell.$$

Therefore, with some positive  $C > 0$ ,

$$\begin{aligned} C \frac{|\bigcup_{k,\ell:k \neq \ell} S_k \cap V_\ell|}{n} &\leq \sum_{k,\ell:k \neq \ell} \sum_{v \in S_k \cap V_\ell} \|WW^T Q(k) - WW^T Q(\ell)\|^2 \\ &\leq 2 \sum_{k,\ell:k \neq \ell} \sum_{v \in S_k \cap V_\ell} \|WW^T Q(k) - \xi_{i^*,k}\|^2 + \|\xi_{i^*,k} - WW^T Q(\ell)\|^2 \\ &\leq 4 \sum_{k,\ell:k \neq \ell} \sum_{v \in S_k \cap V_\ell} \|WW^T Q(\ell) - \xi_{i^*,k}\|^2 \\ &\leq 8 \sum_{k,\ell:k \neq \ell} \sum_{v \in S_k \cap V_\ell} \|WW^T Q(\ell) - Q_v\|^2 + \|Q_v - \xi_{i^*,k}\|^2 \\ &\leq 8\|W_\perp W_\perp^T Q\|_F^2 + 8r_{i^*} \leq 8K\|W_\perp W_\perp^T Q\|^2 + 8r_{i^*} \leq 8K\|W_\perp^T Q\|^2 + 8r_{i^*} \end{aligned}$$

To conclude this proof, we need to show that  $r_{i^*} = O(\|W_\perp^T Q\|^2)$ . Let  $i^t$  be an integer between 1 and  $\log n$  such that  $\frac{\|W_\perp W_\perp^T Q\|_F^2}{n\delta^2} \leq \frac{i^t}{n \log n} \leq \frac{\delta^2}{n}$  with positive constant  $\delta$  close to 0. There exists such  $i^t$  for any  $\delta$ , since  $\|W_\perp W_\perp^T Q\|^2 = o(1)$  and the rank of  $W_\perp W_\perp^T Q$  is  $K$ . Then,

$$\left| \bigcup_{1 \leq k \leq K} \{v \in V_k : \|Q_v - WW^T Q(k)\|^2 \leq \frac{i^t}{4n \log n}\} \right| \geq n - \|W_\perp W_\perp^T Q\|_F^2 \frac{4n \log n}{i^t} \geq n(1 - 4\delta^2).$$

From this, since  $\|Q_v - Q_w\|^2 \leq 2\|Q_v - WW^T Q(k)\|^2 + 2\|Q_w - WW^T Q(k)\|^2$ , when  $v$  satisfying that  $\|Q_v - WW^T Q(k)\|^2 \leq \frac{i^t}{4n \log n}$ ,

$$|X_{i^t, v}| \geq |V_k| - 4\delta^2 n.$$

On the other hand, since  $\|Q_v - Q_w\|^2 \geq \frac{1}{2}\|Q_v - WW^T Q(k)\|^2 - \|Q_w - WW^T Q(k)\|^2$ , when  $v$  satisfying that  $\|Q_v - WW^T Q(k)\|^2 \geq \frac{i^t}{n \log n}$ ,

$$|X_{i, v}| \leq 4\delta^2 n.$$

With small enough constant  $\delta$ , therefore, when  $v$  and  $w$  satisfy that  $\|Q_v - WW^T Q(k)\|^2 \leq \frac{i^t}{4n \log n}$  and  $\|Q_w - WW^T Q(k)\|^2 \geq \frac{i^t}{n \log n}$ ,  $|X_{i, v}| > |X_{i, w}|$ , which indicates that the origin of  $T_{i^t, k}$  is at least  $\|Q_{v_k} - WW^T Q(k)\|^2 \leq \frac{i^t}{n \log n}$  and  $|T_{i^t, k}| \geq |V_k| - 4\delta^2 n$ . Since  $\|\cdot\|$  is a convex function, by Jensen's inequality, for all  $k$ ,

$$\|WW^T Q(k) - \xi_{i^t, k}\|^2 \leq \frac{\sum_{v \in T_{i^t, k}} \|WW^T Q(k) - Q_v\|^2}{|T_{i^t, k}|} \leq \frac{\|W_\perp W_\perp^T Q\|_F^2}{|V_k| - 4\delta^2 n} = O\left(\frac{\|W_\perp^T Q\|^2}{n}\right).$$

Therefore,

$$\begin{aligned} r_{i^t} &= \sum_{k=1}^K \sum_{v \in T_{i^t, k}} \|Q_v - \xi_{i^t, k}\|^2 \leq \sum_{k=1}^K \sum_{v \in V_k} \|Q_v - \xi_{i^t, k}\|^2 \\ &\leq 2 \sum_{k=1}^K \sum_{v \in V_k} \|Q_v - WW^T Q(k)\|^2 + \|WW^T Q(k) - \xi_{i^t, k}\|^2 \\ &\leq 2\|W_\perp W_\perp^T Q\|_F^2 + 2 \sum_{k=1}^K \sum_{v \in V_k} \|WW^T Q(k) - \xi_{i^t, k}\|^2 \\ &= O(\|W_\perp^T Q\|^2) + 2 \sum_{k=1}^K \sum_{v \in V_k} \|WW^T Q(k) - \xi_{i^t, k}\|^2 = O(\|W_\perp^T Q\|^2). \end{aligned}$$

Since  $r_{i^*} \leq r_{i^t}$ ,  $r_{i^*} = O(\|W_\perp^T Q\|^2)$ .

## B.9 Proof of Theorem 5

Let  $\mu(v, S_k^{(g)}) = \mathbb{E}[\sum_{w \in S_k^{(g)}} A_{vw}]$  and  $\text{Var}(v, S_k^{(g)}) = \mathbb{E}[(\mu(v, S_k^{(g)}) - \sum_{w \in S_k^{(g)}} A_{vw})^2]$ . Since  $|\bigcup_{k=1}^K (S_k^{(g)} \setminus V_k^{(g)})| = o(|V^{(g)}|)$  from Theorem 4,  $\frac{\mu(v, S_k^{(g)})}{|S_k^{(g)}|} = p(1 + o(1))$  and  $\frac{\text{Var}(v, S_k^{(g)})}{|S_k^{(g)}|} = p(1 + o(1))$  when  $v \in V_k$ , and  $\frac{\mu(v, S_k^{(g)})}{|S_k^{(g)}|} = q(1 + o(1))$  and  $\frac{\text{Var}(v, S_k^{(g)})}{|S_k^{(g)}|} = q(1 + o(1))$  when  $v \notin V_k$ . By Chebyshev's inequality, when  $v \in V_k$ ,  $v \in S_k$  with high probability since  $\frac{\mu(v, S_k^{(g)}) - \mu(v, S_{k'}^{(g)})}{\sqrt{\text{Var}(v, S_k^{(g)})}} = \omega(1)$  for all  $k' \neq k$  when  $\gamma f(n) = \omega(1)$ .

## B.10 Proof of Theorem 6

In this proof, we use Chernoff bound as the form of Lemma 8.1 in [1].

From Theorem 4, Algorithm 1 classifies the arrival nodes at each time block with diminishing fraction of misclassified nodes. Between  $S_i^{(\tau)}$  and  $S_j^{(\tau+1)}$ , the number of connections is  $\Theta(B^2 \frac{\bar{f}(n)}{n}) = \Theta(\frac{h^2(n)n}{\min\{f(n), n^{1/3}\} \log^2 n}) = \omega(1)$  from the condition of this theorem. Let  $\mu(k, i) = \frac{\sum_{v \in \hat{V}_i} \sum_{w \in S_k^{(\tau)}} A_{wv}}{\sum_{v \in \hat{V}_i} \sum_{w \in S_k^{(\tau)}} 1}$ . By the Chernoff bound, with high probability (since  $\sum_{v \in \hat{V}_i} \sum_{w \in S_k^{(\tau)}} A_{wv} = \omega(1)$ ),  $\mu(k, i) = p(1 - o(1))$  when  $\frac{|S_k^{(\tau)} \cap V_i|}{|S_k^{(\tau)}|} = 1 - o(1)$  and  $\mu(k, i) = q(1 + o(1))$  when  $\frac{|S_k^{(\tau)} \cap V_i|}{|S_k^{(\tau)}|} = o(1)$ . Therefore, with high probability,  $S_k^{(\tau)}$  is merged with  $\hat{V}_{s(k)}$  such that  $\frac{|S_k^{(\tau)} \cap V_{s(k)}|}{|S_k^{(\tau)}|} = 1 - o(1)$ . Thus,  $\frac{|\hat{V}_k \cap V_k|}{|\hat{V}_k|} = 1 - o(1)$  for all  $k$  with high probability.

Since  $\frac{|\hat{V}_k \cap V_k|}{|\hat{V}_k|} = 1 - o(1)$  for all  $k$ , one can easily show using the Chernoff bound that  $\frac{N_{v,k}}{|\hat{V}_k|} \geq p(1 - \frac{p-q}{4})$  when  $v \in V_k$  and  $\frac{N_{v,k'}}{|\hat{V}_{k'}|} \leq q(1 + \frac{p-q}{4})$  when  $v \notin V_{k'}$  with probability  $1 - O(\exp(-cT \frac{f(n)}{n}))$  with a constant  $c > 0$ . Thus, the probability for that  $\frac{N_{v,k}}{|\hat{V}_k|} \leq \frac{N_{v,k'}}{|\hat{V}_{k'}|}$  for  $v \in V_k$  and  $k \neq k'$  is  $O(\exp(-cT \frac{f(n)}{n}))$ .

## References

- [1] A. Coja-Oghlan. Graph partitioning via adaptive spectral techniques. *Combinatorics, Probability & Computing*, 19(2):227–284, 2010.
- [2] U. Feige and E. Ofek. Spectral techniques applied to sparse random graphs. *Random Structures & Algorithms*, 27(2):251–275, 2005.
- [3] I. Mitliagkas, C. Caramanis, and P. Jain. Memory limited, streaming PCA. In *Advances in Neural Information Processing Systems*, 2013.

- [4] M. Rudelson and R. Vershynin. The littlewood–offord problem and invertibility of random matrices. *Advances in Mathematics*, 218(2):600–633, 2008.
